# Supplementary material
Source: PubMed Central journal article supplement (PMC8802905)
Supplement: NIHMS1772721-supplement-Fig_S1_and_S2.pdf [file NIHMS1772721-supplement-Fig_S1_and_S2.pdf]

**Characterization of 1,2-Distearoyl-*sn*-glycero-3-phosphoethanolamine-*N*-  
[Methoxy(polyethylene glycerol)-2000] and Its Complex with Doxorubicin Using Nuclear  
Magnetic Resonance Spectroscopy and Molecular Dynamics**

**Weidong Hu<sup>1</sup>, Allen Mao<sup>1</sup>, Patty Wong<sup>2</sup>, Adrien Larsen<sup>3</sup>, Paul J. Yazaki<sup>1</sup>, Jeffrey Y.C.  
Wong<sup>2</sup>, and John E. Shively<sup>1</sup>**

<sup>1</sup> Department of Molecular Immunology, Beckman Research Institute of City of Hope, Duarte,  
CA 91010

<sup>2</sup> Department of Radiation Oncology, City of Hope National Medical Center, Duarte, CA 91010

<sup>3</sup> Computational Therapeutics Core, Beckman Research Institute of City of Hope, Duarte, CA  
91010

Running Title: NMR and MD analysis of Dox-DSPE-PEG<sub>2000</sub>

## SUPPLEMENTARY FIGURES

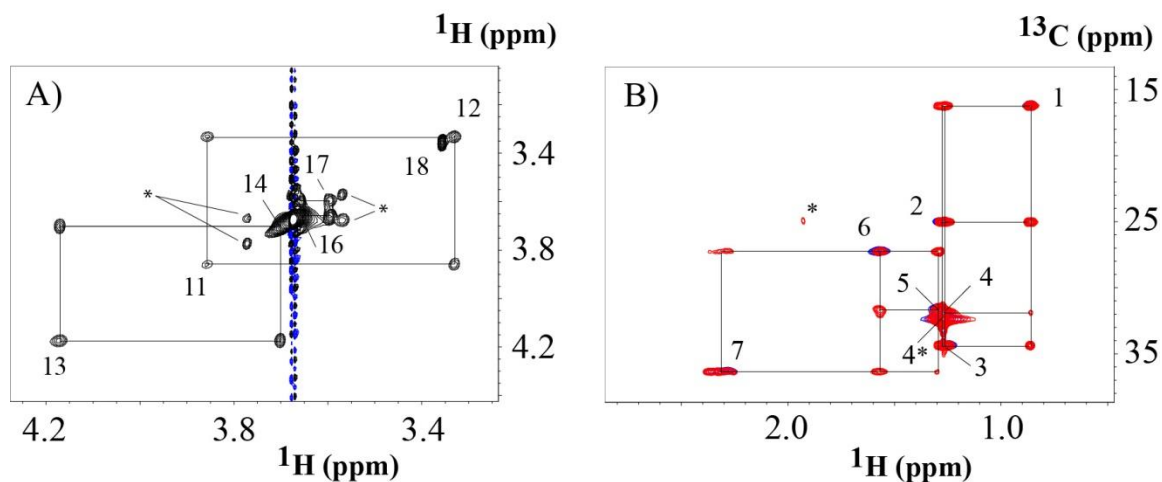

**Figure S1. 2D TOCSY, HSQC and HSQC-TOCSY spectra of DSPE-PEG<sub>2000</sub>.** (A) 2D TOCSY correlations of individual ethylene glycol units at both sides of main body of polyethylene glycol. (B) Overlay of HSQC (blue color) and HSQC-TOCSY (red color) spectra from end of fatty acyl chains, and the region close to lipid head groups of DSPE lipid (See Figure 1B for DSPE-PEG<sub>2000</sub> numbering scheme). The cross peaks denoted with \* in A) are from the J coupling between  $^1\text{H}$  and natural abundance of  $^{13}\text{C}$ , and the peak labeled with \* in B) is from residual proton of NaAc-d<sub>3</sub>.

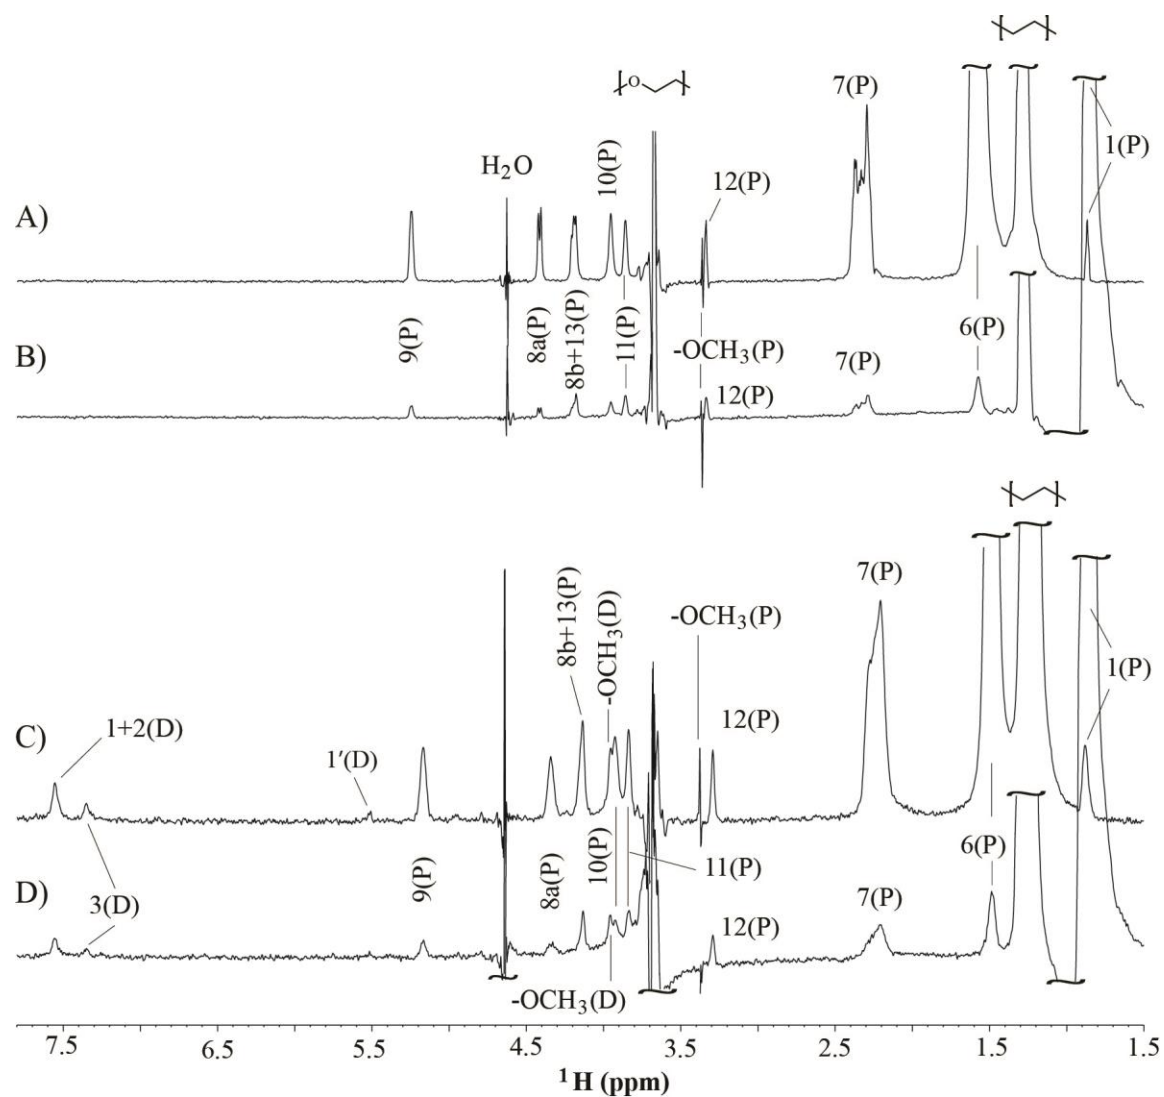

**Figure S2. Vector details of the NOESY spectra of the DSPE-PEG<sub>2000</sub> with and without DOX.** (A) A 1D slice along the direct dimension taken at position of 6H(P) and (B) A 1D slice along the direct dimension taken at position of 1H(P) from 2D NOESY acquired on the free DSPE-PEG<sub>2000</sub>. (C) A 1D slice along the direct dimension taken at position of 6H(P) and (D) 1D slice along the direct dimension taken at position of 1H(P) from 2D NOESY acquired on the complex composed of 3.4 mM Dox and 3.7 mM DSPE-PEG<sub>2000</sub>. There are base line distortions at strong and sharp peaks of -OCH<sub>3</sub>(P), H<sub>2</sub>O, 15\*H(P) and 4\*H(P) positions. In order to observe peaks close to strong peaks of 15\*H(P) and 4\*H(P) clearly, pre-saturation was used simultaneously to suppress these two peaks.
